# Supplementary material for: A Triple Gene-Deleted Pseudorabies Virus-Vectored Subunit PCV2b and CSFV Vaccine Protects Pigs against PCV2b Challenge and Induces Serum Neutralizing Antibody Response against CSFV
Source: MDPI journal article supplement (doi:10.3390/vaccines10020305), 2022-02-16
Supplement: s1 [file s1]

**GAATTC**tccgcagtagccggcgatgatgatggtggcgcgcgacgtgacccggctccccgcggggctcc

tctctgcgcgcacctgaccttgccgcgcctgacccgcgcgtcgggggcgctcctcttcagggggcgccggcgt  
cagcgtgcacgtcgccggcagcgcgcgtcctcgtgcccggcgacgcgcaccaacctgacgategacgggacg  
ctgctgtttctggagggggccctcgccgagcaactacagcgggcgcgtggagctgctgcgcctcgacccca  
agcgcgcctgctacacgcgcgagtagcccgccgagtagacacctctgccccgcgtgcaccacgaggcctt  
ccgcggctgtctgcgaagcgcgagccgctcgccccggcgcgcgtccgcgcggtggagggcgcgcggcgtg  
ctgttcgtctcgcgcgcccgccccgcggacgcggggctcgtagctgctgcgggtccgcgtgaacgggacca  
cggacctctttgtgctgacggccctggtgccgccagggggcgcccccaaccacccacgcgcgtcgtccgc  
ggacgagtgcgcggcccgctcgtcggatcgtggcacgacagcctgcgcgctcgtggaccccgccgagggacgc  
gtgttcaccacgcgcgcccccgatcgagccagagcgcgcgacgacccccgcgcccccccgggggaccggcg  
ccacccccgagccccgctccgacgaagaggaggaggacgaggagggggcgacgacggcgatgacccccggt  
gcccgggacctggacgcgaacggcacgatgggtgctgaacgccagcgtcgtgtcgcgcgtcctgctcgcc  
gccgccaacgccacggcggggcgcccggggccccgggaagatagccatgggtgctggggccacgatcgtcg  
tctcctgatcttcttggggggggtcgctgcgcgcccgcgctgcgcgcggaatcgatctaccggcc  
gcgacccggggcgcggccccggcggtccacgcgcgcgcccccgcggcgccccgccccccagccccgctcgccggg  
gcgcccgtccccagcccaagatgacgttgccgagcttcgccagaagctggccaccatcgagaggaac  
aataaaaaaggtggtgtttgcataattttgtgggtggcgttttatctccgtccc**GGTACCATAGTAATCAA**

TTACGGGGGTCAATTAGTTTCATAGCCCATATATGGAGTTCGCGGTTACATAAAGTTACGGTAAATGGCCCGCC  
TGGCTGACCGCCCAACGACCCCCGCCATTGACGTCAATAATGACGTATGTTCCCATAGTAACGCCAATA  
GGGACTTTCCATTGACGTCAATGGGTGGACTATTTACGGTAAACTGCCCACTTGGCAGTACATCAAGTGT  
ATCATATGCCAAGTACGCCCCCTATTGACGTCAATGACGGTAAATGGCCCGCCTGGCATTATGCCCAGTA  
CATGACCTTATGGGACTTTTCTACTTGGCAGTACATCTACGTATTAGTCATCGCTATTACCATGCGTCGA  
GGTGAGCCCCACGTTCTGCTTCACTCTCCCCATCTCCCCCCCCCTCCCCACCCCAATTTTGTATTTATTT  
ATTTTTTAATTATTTTATGCAGCGATGGGGGCGGGGGGGGGGGGGCGCGGCCAGGCGGGGCGGGGCGG  
GGCGAGGGGCGGGGCGGGGCGAGGCGGAGAGGTGCGGCGGCAGCCAATCAGAGCGGCGCGCTCCGAAAGT  
TTCCTTTTATGGCGAGGCGGCGGCGGCGGCCCTATAAAAAGCGAAGCGCGCGGCGGGCGGGAGTTCG  
TGC GTTGCCTTCGCCCCGTGCCCCGCTCCGCGCCGCTCGCGCCGCCCGCCCCGGCTCTGACTGACCGCG  
TTACTCCCACAGGTGAGCGGGCGGGACGGCCCTTCTCCCTCCGGGCTGTAATTAGCGCTTGGTTTAATGA  
CGGCTCGTTTTCTTTTCTGTGGCTGCGTGAAAGCCTTAAAGGGCTCCGGGAGGGCCTTTGTGCGGGGGGA  
GCGGCTCGGGGGGTGCGTGCGTGTGTGTGTGCGTGGGGAGCGCCGCGTGCGGCCCGCGCTGCCCGGCGGC  
TGTGAGCGCTGCGGGCGCGGCGCGGGGCTTTGTGCGCTCCGCGTGTGCGCGAGGGGAGCGCGGGCCGGGG  
GCGGTGCCCGCGGTGCGGGGGGGCTGCGAGGGGAACAAAGGCTGCGTGCGGGGTGTGTGCGTGCGGGGG  
TGAGCAGGGGGTGTGGGCGCGGCGGTGCGGCTGTAACCCCCCCTGGCACCCCCCTCCCCAGTTGCTGA  
GCACGGCCCCGGCTTCGGGTGCGGGGCTCCGTGCGGGGCGTGCGCGGGGCTCGCCGTGCCGGGCGGGGG  
TGGCGGCAGGTGGGGGTGCCGGGCGGGGCGGGGCCGCCCTCGGGCCGGGGAGGGCTCGGGGGAGGGGCGCG  
GCGGCCCCGAGCGCCGGCGGCTGTGAGGCGCGGCGAGCCGAGCCATTGCCTTTTATGGTAATCGTGC  
GAGAGGGCGCAGGGACTTCCTTTGTCCCAATCTGGCGGAGCCGAAATCTGGGAGGCGCCGCCGCACCC  
CTCTAGCGGGCGCGGGCGAAGCGGTGCGGCGCCGGCAGGAAGGAAATGGGCGGGGAGGGCCTTCGTGCGT  
CGCCGCGCCGCCGTCCCCCTTCTCCATCTCCAGCCTCGGGGCTGCCGCGAGGGGGACGGCTGCCTTCGGGG  
GGACGGGGCAGGGCGGGGTTCGGCTTCTGGCGTGTGACCGCGGCTTTAGAGCCTCTGCTAACCATGTTT  
ATGCCTTCTTCTTTTCTACAGCTCCTGGGCAACGTGCTGGTTGTTGTGTGCTGTCTCATCATTTTGGCAA  
**gctagc**GCCGCCACCATGCTCCTCGCCGCTCTCCTCGCCGCTCTCGTGCAGAACCACTCGGGGCC

GACTCGCCTGTAAAGAAAATTATAGATACGCCATCTCCAGCACCAACGAGATTGGGCTGCTCGGCGCCGA

AGGACTGACCACAACCTGGCAGGAGTACAACCAGGACCTGCAGCTCAATGATGGCACCGTCAAGGCCATC  
TGCGAAGCTGGCTCCTTCAAAGTGATTGCTCTGAATGTGGTCTCTCGCCGCTACCTGGCCTCACTCCACA  
AGGAGGCTTCTCTGACCTCAGTGACATTCGAAGTGTCTTTGACGGGACCTCCCCAGCACAGAGGAAAT  
GGGCGACGATTTTCGGCTTTGGACTGTGTCCCTTCGATACCTCCCCAGTGGTCAAGGGAAAATACAACACA

[illegible]

5'-EcoRI

**GAATTC**ccgccttatcaccgcgcccacccgctccccgcccggccccgcgcgcgcagcgatcgcgat**tcacc**  
**PRV TK flanking upstream** **Stop U<sub>L</sub>24**

gccgcggccccggcgacgtactcggcgaggccgcgcacggtcgcgggccatcgcgctcgcggttgccgcgcgt  
ctgggtgcagggcaggcgcgctcacgtcgagcacgcgcacatgctccgctggggccacgaacaccagcaggggc  
acgagcgtgatctcctcgccgcccgggggacggcgggcgaggaggcgccgagtcgcgcagctggc  
acagccccctcgtgccgctgcccgcgcttgctgggctgttgaggttcggggggaagcggcacgtcttgag  
ctcgtatgacgaagcacaggtgcggccccacccccagccgcaccacgcacacgcagtcggggcggcgcacc  
ccgaggttgacttcaaaggccagggtcaaggacgccttcttaagcgtctcgcggggaagcccgaagagac  
tctcgccgtacgcggacgggtcgcgggcgaggcgttcgtagaagcgggttggtggcagcggatccccgccc  
gaagcgcgccggg**atgcgcac**ctcaggatctacctcgacggcgccctacggcaccgggaagagcaccacg

**Start TK → ←Start U<sub>L</sub>24**

Gccccgggtgatggcgctcggcgggggcgctgtacgtgctcgagccgatggcggtactggcgcaactctgttcg  
acacggacacggtggccggtatttacgatgcgcagaccgggaagcagaacggcagcctgagcgaggagga  
cgcgccctcgtcacggcgagcaccaggccgcttcgcgacgcctacctgctgctgcacacgcgcctg  
gtcccgcctcttcgggcccgcgggtcgaggccccgcccgtgatgacggtcgtctttgaccgccacccgggtg  
ccgcgacggtgtgcttcccgcgtggcgcgcttcacgtcggggacatcagcgcgggcgcccttcgtgggcTA  
**AGTGAGTAAAGGTACC**CTCGTGAGGCTCCGGTGCCGTCAGTGCGCAGAGCGCACATCGCCACAGTCCCC

**Stop/Stop/Stop KpnI**

**hEF-1α promoter**

GAGAAGTTGGGGGAGGGGTTCGGCAATTGAACCGGTGCCTAGAGAAGGTGGCGCGGGGTAAACTGGGAAA  
GTGATGTCGTGTACTGGCTCCGCCTTTTTTCCCGAGGGTGGGGGAGAACCGTATATAAGTGCAGTAGTCGC  
CGTGAACGTTCTTTTTTCGCAACGGGTTTGCCGCCAGAACACAGGTAAGTGCCGTGTGTGGTTCCCGCGGG  
CCTGGCCTCTTTACGGGTTATGGCCCTTGCGTGCCTTGAATTACTTCCACCTGGCTGCAGTACGTGATTC  
TTGATCCCCGAGCTTCGGGTTGGAAGTGGGTGGGAGAGTTCGAGGCCTTGCGCTTAAGGAGCCCCCTTCGCC  
TCGTGCTTGAGTTGAGGCCTGGCCTGGGCGCTGGGGCCGCCGCTGCGAATCTGGTGGCACCTTCGCGCC  
TGTCTCGCTGCTTTTCGATAAGTCTCTAGCCATTTAAAATTTTTTGATGACCTGCTGCGACGCTTTTTTTCT  
GGCAAGATAGTCTTGTAATGCGGGCCAAGATCTGCACACTGGTATTTTCGGTTTTTGGGGCCGCGGGCGG  
CGACGGGGCCCGTGCGTCCAGCGCACATGTTTCGGCGAGGCGGGGCTGCGAGCGCGGCCACCGAGAATC  
GGACGGGGGTAGTCTCAAGCTGGCCGGCCTGCTCTGGTGCCTGGCCTCGCGCCGCCGTGTATCGCCCCGC  
CCTGGGCGGCAAGGCTGGCCCGGTTCGGCACCAAGTTGCGTGAGCGGAAAGATGGCCGCTTCCCGGCCCTGC  
TGCAGGGAGCTCAAAATGGAGGACGCGGCGCTCGGGAGAGCGGGCGGGTGAGTCACCCACACAAAGGAAA  
AGGGCCTTTCCGTCTCAGCCGTCGCTTCATGTGACTCCACGGAGTACCGGGCGCCGTCCAGGCACCTCG  
ATTAGTTCTCGAGCTTTTGGAGTACGTGCTCTTTAGGTTGGGGGGAGGGGTTTTATGCGATGGAGTTTCC  
CCACACTGAGTGGGTGGAGACTGAAGTTAGGCCAGCTTGGCACTTGATGTAATTCTCCTTGGAATTTGCC  
CTTTTTGAGTTTGGATCTTGGTTCATTCTCAAGCCTCAGACAGTGGTTCAAAGTTTTTTTTCTTCCATTTT  
AGGTGTCGTGAGGAATTAGCTTGGTACTAATACGACTCACTATAGGGAGACCCAAGCTGGCTAGGTAAGT  
GTACGAGCTCGATCACTAGTCCAGTGTGG**gctagc**GCCGCCACCATGCTGCTCGCCGCCCTGCTCGCTGC

**NheI**

**Kozak**

**PRV gD signal sequence**

CCTCGTCGCCCCGACAACACTGATGACATACCCTCGGAGAAGATACAGAAGAAATGGGATTTTCAACACC

**PCV2 Cap**

AGGCTCTCTAGAACCTTTGGGTATACAGTGAAGCGCACACAGTCACCACACCTTCCTGGGCCGTGGACA  
TGATGCGGTTCAAGCTGGACGATTTTGTCCCCCTGGCGGGGAACCAATAAAATCAGCATTCCCTTCGA  
GTACTATCGCATCCGGAAGGTGAAAGTCGAATTTGGCCCTGCTCCCCTATTACCCAGGGAGACAGGGGA  
GTGGGATCTACAGCTGTCATCCTCGACGATAACTTCGTGCCAAAAGCCAATGCTCTGACCTACGATCCCT  
ATGTGAACCTACAGCTCCAGGCACACCATTCACAGCCCTTCTCTTATCATAGCAGATACTTTACCCCTAA  
GCCAGTGCTCGACTCCACAATCGATTACTTCCAGCCCAACAATAAACGCAACCAGCTGTGGCTCAGGCTG  
CAGACCAGCCGGAATGTGGACCACGTCGGACTGGGCACAGCCTTTGAGAACTCCAAGTATGACCAGGATT  
ACAATATCCGCGTCACAATGTATGTCCAGTTCAGGGAGTTCAATCTCAAAGACCCACCTCTCAATCCAgc  
**ggccgct**ggtaagcctatccctaaccctctcctcggtctcgattctacgCGTACCGGT**CATCATCACCAT**

**NotI**

**→**

**V5 epitope**

**6x His**

**CACCAT****TGA**AGTTTAAACCCGCTGATCAGCCT**CGACTGTGCCTTCTAGTTGCCAGCCATCTGTTGTTTGCC**

**Stop**

**Poly A**

CCTCCCCCGTGCCTTCCTTGACCCTGGAAGGTGCCACTCCCCTGTCCTTTCTAATAAAATGAGGAAAT  
TGCATCGCATTGTCTGAGTAGGTGTCATTCTATTCTGGGGGGTGGGGTGGGGCAGGACAGCAAGGGGGAG  
GATTGGGAAGACAATAGCAGGCATGCTGGGGATGCGGTGGGCTCTATGGCTT**AAGCTT**HindIIItcgctggaccg

gacgagcacctgcggcgccctgcgcgccccgcgcgcgcgcgcggggagcacgtggacgcgcgcctgctcacgg

**PRV TK flanking downstream**

ccctgcgcaacgtctacgccatgctggtcaacacgtcgcgctacctgagctcggggcgccgctggcgcgga  
cgactggggggcgcgcgcccgcttcgaccagaccacgcgcgactgcctcgcgctcaacgagctctgccgc  
ccgcgcgacgaccccgagctccaggacaccctcttcggcgcggtacaaggcgcccgagctctgcgaccggc  
gcggggcgcccgctcgaggtgcacgcgtggcgatggacgcgctcgtggccaagctgctgccgctgcgcgt  
ctccaccgtcgacctggggccctcgccgcgcgcctgcgcgcgcgcgtggcggcgcaggcgcgcgccatg  
gaggtgacggagtcgcgtaacggcgaccacatccggcagtgcggtgtgcgccttcacgtcggagatggggg  
tg**tga**ccctcgccctcccaccgcgcgcgcgcggcgatggagaccgcgacggaggcaacgacgacggcgt

**Stop TK**

Gggaggggggtcggggcgcggtataaagccatgtgtatgtcatcccaataaagtttgccgtgcccgtcacc  
**atg**cccgcgctcgctcgtgcgcctcccgctgcgcctcctgaccctcgcgggcctcctggccctcgcgggg

**Start U<sub>L</sub>22 (gH) →**

ccgcgcctcgcggcgggcgcgccgcaggggtggggcgccctcgcgcgaggggggtcccgcgccaccgc  
ggcgcccgcgcgggggccaccctgttcgtcccggtcggcgacggctccgcgtggttcgtcttcagctc  
ggcgggctggggcgctcaacgacacgcgcacatccgcgggcacctgctcgggc**ATGCAT-3**

**NsiI**

**Supplementary figure S2: Nucleotide sequence of the PRV TKΔ PCV2 Cap insertion plasmid (pPRV TKΔ/PCV2 Cap-INS).** The nucleotide sequence for the PRV TKΔ PCV2 Cap insertion was assembled using the plasmid pPRV TKΔ and pPCV2 Cap chimeric gene cassette. The PRV TKΔ PCV2 Cap insertion plasmid consisted of the following (5' to 3'): i) EcoRI restriction site (bold, underlined); ii) PRV TK flanking upstream (lower case), start and stop codon of U<sub>L</sub>24 and start codon of TK are highlighted; iii) three stop codons (underlined); iv) KpnI restriction site (bold, underlined); v) hEF-1αpromotor sequence; vi) NheI restriction site (bold, underlined); vii) Kozak sequence (italic); viii) PRV gD signal (underlined); ix) PCV2 Cap coding sequence (highlighted); x) NotI restriction site (bold, underlined); xi) V5 epitope coding sequence (lower case, italic); xii) 6x His epitope coding sequence (bold); xiii) Stop codon (TGA) (bold, italic); xiv) bovine growth hormone terminator (italic, underlined); xv) HindIII restriction site (bold, underlined); xvi) PRV TK flanking downstream (lower case), stop codon of TK and start codon of U<sub>L</sub>22 (gH) are highlighted; xvii) NsiI restriction site (bold, underlined).

5'- EcoRI

**GAATTC**ggcgacggcgacggcgacagcagcggggacgaggacgacgatgacgggggggctgacgcggcagg

**PRV gG flanking upstream**

ccgcgtcgcgcacatcgccacggacctgggcttcgaggtgctgcagccctgcagtcgggctcggagggccg  
cgtcttcgtggcccgccggcccgagggcgacacgggtggtgctgaaggtgggcccagaagccctcgacg  
ctgatggagggcatgctgctgaagcgccctggccacgataacgtcatgagcctgaagcagatgctcgccc  
ggggcccggtgacgtgctgctgctgcccacttttcgggtgcgatctgtacagctacctgaccatgcgggga  
cgggcccgtggacatgcgcgacgcggggcgctgatccgggtccgtgctccgcgggctcgccctacctgcac  
gggatgcgcacatcatgcaccgcgacgtcaaggcgagaaacatcttcctcgaggacgtggacacgggtgtgcc  
tgggggacctcggggccgcgcgtgcaacgtggcgggcgcccaacttttacggactcgccgggaccatcga  
gaccaacgcccccgaggtgctcgcgcgacccgctacgacaccaaggtcgacgtctggggcgcgggggtg  
gtgctcttcgagacgtggcctaccccaagacgatcgccggcggggacgagcccgcgatcaacggggaga  
tgacactgatcgacctcatccgcgcctcgggggtgacccccgaggagtcccgcccgacacgcgcctccg  
gagcgagttcgtccggtacgcgggacccaccgcagccgtacacgcagtacgcgcgcgtgggtcgcctc  
gggctgcccagacgggggctttcctgatttacaagatggttgacgtttgatcccgtccgcgccttcctc  
ctgatgagataactcaactttggaatgtggaccgtataaaacggccgggctccgagcggtaggacacacac  
acctttgcgcacatctccacagctcaaca**ttcaataaagtaGGTACC**TAGTTATTAATAGTAATCAATTACG

**Us3/Us4 Poly A**

**KpnI**

**CMV promoter**

GGGTCATTAGTTCATAGCCCATATATGGAGTTCGCGTTACATAACTTACGGTAAATGGCCCGCCTGGCT  
GACCGCCCAACGACCCCCGCCCATTTGACGTCAATAATGACGTATGTTCCCATAGTAACGCCAATAGGGAC  
TTTCATTGACGTCAATGGGTGGAGTATTTACGGTAAACTGCCCACTTGGCAGTACATCAAGTGTATCAT  
ATGCCAAGTACGCCCCCTATTGACGTCAATGACGGTAAATGGCCCGCCTGGCATTATGCCCAGTACATGA  
CCTTATGGGACTTTTCCTACTTGGCAGTACATCTACGTATTAGTCATCGCTATTACCATGGTGATGCGGTT  
TTGGCAGTACATCAATGGGCGTGGATAGCGGTTTGAATCACGGGGATTTCCAAGTCTCCACCCCATTTGAC  
GTCAATGGGAGTTTGTGTTTGGCACCAAAATCAACGGGACTTTCCAAAATGTCGTAACAACCTCCGCCCCAT  
TGACGCAAATGGGCGGTAGGCGTGTACGGTGGGAGGTCTATATAAGCAGAGCTGGTTTAGTGAACCGTCA  
GATCCGCTAGCGCTACCGGT**GCCGCCACC**ATGCTGCTCGCTGCTCTCCTCGCTGCTCTCGCTCGCTCGCAC

**Kozak**

**PRV gD signal**

**AACCCTCGGGGCT****GAAAACATTACCCAGTGAACCTCTCTGACAACGGGACCAACGGAATCCAGCACGCC**

**CSFV E<sup>ms</sup> Brescia**

ATGTACCTGAGGGGGGTGAGCAGATCCCTCCATGGAATCTGGCCAGAGAAGATTTGCAAAGGGGTCCCCA  
CCTATCTGGCCACCGACACAGAGCTCAAGGAAATTCAGGGCATGATGGATGCTTCCGAGGGGACCAACTA  
CACATGCTGTAAGCTGCAGCGGCACGAATGGAACAAGCATGGCTGGTGTAACCTGGTATAATATCGACCCC  
TGGATTCAAGCTGATGAACAGGACCCAGGCTAATCTCGCTGAGGGACACCTGCTAAGGAATGCGCTGTGA  
CCTGTGCGGTACGACAAAAACGCCGATATCAATGTGGTCAACCGAGGTAGGAACAGGCAACCAACTGAC  
AGGATGCAAGAAAGGCAAGAATTTAGCTTTGCCGGGACCGTGATCGAGGGACCTTGCAACTTCAACGTG  
AGCGTCGAGGACATTTCTGTACGGCGATCACGAATGTGGGTCTCTGCTCCAGGACACCGCCCTGTATCTCG  
TGGATGGCATGACCAACACAATCGAGAATGCCAGGCAGGGAGCCGCTAGAGTGACCTCTTGGCTGGGCAG  
GCAGCTCAGCACAGCTGGAAAGCGCCTGGAGGGCCGGTCCAAAACCTGGTTTGGGGCCTACGCTATGGCC  
CCAACCAGGCCACCCAGCCAGTGACAAGACCTTGGCAGCACGTCGACGCCATTAAGGAGGCTCTGTCCC

**GM-CSF**

**TGCTCAACAATTCTAACGATACCGCCGCTGTGATGAATGAAACAGTCGACGTGGTCTGCGAGATGTTTCA**  
**TCCTCAGGAACCAACCTGCGTGCAGACAAGACTGAACCTCTACAAGCAGGGACTGAGGGGGAGCCTGACC**  
**CGGCTCAAGTCCCCCTCTGACACTGCTCGCCAAACACTATGAGCAGCATTGCCCACTGACCGAGGAAACAA**  
**GCTGTGAAACCCAGTCCATCACATTCAAGTCTTTTAAAGACTCCCTGAATAAGTTCTGTTTACCATCCC**

TTTTGATTGCTGGGGGCCTGTGAAGAAG*gactacaaagacgatgacgacaag****TAACTGATCATAATCAGC***  
FlagStop  
CATACCACATTTGTAGAGGTTTACTTGCTTTAAAAAACCTCCCACACCTCCCCCTGAACCTGAAACATA  
**SV40 terminator**  
AAATGAATGCAATTGTTGTTGTTAACTTGTTTATTGCAGCTTATAATGGTTACAAATAAAGCAATAGCAT  
CACAAATTTACAAATAAAGCATTTTTTTTCACTGCATTCTAGTTGTGGTTTGTCCAAACTCATCAATGTA  
TCTTAGGATCC*gcctctcgacgtatcgctcccgctcctcggaacccgctcaacgtgacccgtcgccctggttct*  
BamHIPRV gG flanking downstream  
 ttgacggcggccactgcaaggtgcccctcgccaccgcgagtactacggctgccccggggacgccatgcc  
 ctccgtcgagacgtgcaccggcggtactcgtagaccgcgacgcgcacccctgatggagtacgcc  
 ctctgaacgccagcctcgctgctgcagcccggttgtagcagcgcggcctgtacatcgctcgctcgtct  
 ttggcgacgacgcctacctcggcaccgtctccctgtcggaggccaaacctggactacccctgcggcat  
 gaagcacgggctcacgatcaccgcggggggccaccctccaccatcgccccacggcgcgaccac  
 cagcgtggtcgcggtgcttcccctcgaccgacgagggcgccctgggagaacgtgaccgcgcgcgagaagg  
 gcctgtccgacgactacgcgactactacgacgtgcacatcttccgctcgaggtctgacgacgaggtcgt  
 ccacggcgatgccccgaggcccccgagggcgaggggtgaccgaggaggaggccgagctgacctccagc  
 gacctcgacaacatcgagatcgaggtcgtgggctctcccgccgctcccgctcgagggcgccggcgacggcg  
 aggagggggcgcggggacgaggagacgaggagctgacctccagcgacctcgacaacatcgagatcgaggt  
 cgtgggctcgcccgcgccgcgccttcttcgcccctccaccaccccccgcgccccacccgcgcggcc  
 gagatcacgacctgaccacgggtaccacgggtgcggacgaccgaggaccccgcgccatcaccgactgcc  
 gccggagcgacttcgtctcgccctctgacatcttctgtgacccccaccggcagccccgcctgctcctggg  
 cttcctgggcagcgcgctcgccctcg**AAGCTT**-3  
HindIII'

**Supplementary figure S3: Nucleotide sequence of PRV gGA CSFV E<sup>rns</sup> GM-CSF insertion plasmid (pPRV gGA CSFV E<sup>rns</sup>-GM-CSF-INS).** The 4021 bp long nucleotide sequence for the PRV gGA CSFV E<sup>rns</sup> GM-CSF Flag insertion was assembled from plasmid pPRV gGA and pCSFV E<sup>rns</sup> GM-CSF chimeric gene cassette. The PRV gGA CSFV E<sup>rns</sup> GM-CSF insertion plasmid consisted of the following (5' to 3'): i) EcoRI restriction site (bold, underlined); ii) PRV gG flanking upstream (lower case); iii) Us3/Us4 polyadenylation signal (lower case, bold, italic); iv) KpnI restriction site (bold, underlined); v) CMV promotor sequence; vi) Kozak sequence (italic); vii) PRV gD signal (underlined); viii) CSFV E<sup>rns</sup> coding sequence (highlighted); ix) GM-CSF coding sequence (underlined, highlighted); x) Flag epitope coding sequence (lower case, italic); xi) Stop codon (TAA) (bold, italic); xii) SV40 terminator (italic, underlined); xiii) BamHI restriction site (bold, underlined); xiv) PRV gG flanking downstream (lower case); HindIII restriction site (bold, underlined).

**Supplementary table S1: Growth kinetics assay for PRV wild type and PRVtmv+.** Virus titer (PFU/ml) (hours-post infection). PFU - Plaque forming units

| Virus         | Virus titer (PFU/ml) (hours-post infection) |        |       |        |        |        |        |       |       |        |        |
|---------------|---------------------------------------------|--------|-------|--------|--------|--------|--------|-------|-------|--------|--------|
|               | 0                                           | 1      | 3     | 6      | 8      | 12     | 18     | 24    | 30    | 36     | 44     |
| PRV wild type | 4.6275                                      | 3.2385 | 3.176 | 2.9375 | 4.6505 | 6.199  | 7.287  | 7.088 | 7.471 | 7.088  | 7.176  |
| PRVtmv+       | 4.642                                       | 3.2385 | 2.699 | 3.272  | 5.088  | 5.8495 | 7.3495 | 7.565 | 7.398 | 7.1775 | 7.1505 |

Supplementary table S2: Rectal temperature

Body temperature in pigs (°C)  
(Normal range – 38.67 to 39.78°C)  
dpv - days-post vaccination

| dpv | Control group (°C) |       |       |       |       | Fostera group(°C) |       |       |       |       | PRVtmv+ group (°C) |       |        |       |                    |
|-----|--------------------|-------|-------|-------|-------|-------------------|-------|-------|-------|-------|--------------------|-------|--------|-------|--------------------|
|     | 2311               | 2307  | 2301  | 2308  | 2314  | 2319              | 2316  | 2318  | 2305  | 2310  | 2320               | 2313  | 2304   | 2317  | 2301               |
| 0   | 39.44              | 39.05 | 38.56 | 39.17 | 39.22 | 39.33             | 39.78 | 39.67 | 39.39 | 39.67 | 38.05              | 38.44 | 39.67  | 38.33 | 39.44              |
| 2   | 39.44              | 39.78 | 39.33 | 39.56 | 39.61 | 39.33             | 39.67 | 39.39 | 39.05 | 39.83 | 39.44              | 39.78 | 39.11  | 37.78 | 39.22              |
| 4   | 39.94              | 40.05 | 39.05 | 39.56 | 39.44 | 39.78             | 39.5  | 39.61 | 39.44 | 39.44 | 39.16              | 39.11 | 39.61  | 39.16 | 39.78              |
| 6   | 39.94              | 40.28 | 39.44 | 38.94 | 39.44 | 39.78             | 39.33 | 40    | 40.22 | 40.05 | 39.66              | 39.67 | 38.61  | 38.94 | 39.5               |
| 8   | 38.33              | 38.78 | 38.89 | 38.61 | 39.11 | 38.89             | 39.44 | 39    | 38.89 | 39.66 | 39.05              | 39.5  | 39.16  | 39    | 39.83              |
| 15  | 38.72              | 39.5  | 38.67 | 39.5  | 37.78 | 39.11             | 38.78 | 39.67 | 39.17 | 39.78 | 39.44              | 39.89 | 39.83  | 39.05 | 39.94              |
| 21  | 38.17              | 39.56 | 38.44 | 38.72 | 39.11 | 39.67             | 39    | 39    | 39.56 | 38.83 | 38.72              | 39.17 | 39.16  | 38.83 | 39.5               |
| 32  | 39.17              | 39.5  | 38.83 | 39.33 | 38.89 | 39.44             | 39.61 | 39    | 39.28 | 39.11 | 39.05              | 39.05 | 39.33  | 39.05 | 38.56              |
| 39  | 38.78              | 39.39 | 39.33 | 39.39 | 39.28 | 39.05             | 39.78 | 39    | 39.39 | 38.89 | 38.78              | 39.05 | 38.944 | 38.94 | 39.56              |
| 45  | 38.17              | 38.5  | 39.17 | 39.56 | 39.28 | 39                | 39.28 | 39.11 | 39    | 38.67 | 39.56              | 39.5  | 39.11  | 38.83 | 38.39              |
| 49  | 39.39              | 39.33 | 39.28 | 39.39 | 39.5  | 39.5              | 39.56 | 39.28 | 38.83 | 38.39 | 39.05              | 39.61 | 39.44  | 39.11 | 39.56              |
| 53  | 37.78              | 39    | 37.39 | 37.78 | 37.61 | 39                | 38.22 | 39    | 38.28 | 37.78 | 38.55              | 39.11 | 38.61  | 38    | <sup>2</sup> 39.22 |



**Supplementary table S3: Body weight (in pounds)**

| Group   | Animal | Body weight (in pounds) days-post vaccination |       |        |        |        |
|---------|--------|-----------------------------------------------|-------|--------|--------|--------|
|         |        | Day 0                                         | Day 6 | Day 32 | Day 45 | Day 53 |
| Control | 2311   | 38.8                                          | 49.2  | 63.8   | 75.2   | 77     |
|         | 2307   | 39.5                                          | 41    | 53     | 58.6   | 62.2   |
|         | 2301   | 32.6                                          | 34.8  | 45.2   | 50.6   | 54.2   |
|         | 2308   | 27.2                                          | 39    | 50     | 59     | 62.8   |
|         | 2314   | 44.2                                          | 45.8  | 57.4   | 59     | 63.8   |
| Fostera | 2319   | 36.8                                          | 34.6  | 46.2   | 54.8   | 58.6   |
|         | 2316   | 38                                            | 36.6  | 52.4   | 58.2   | 61     |
|         | 2318   | 42.8                                          | 43.4  | 60.4   | 71.4   | 80.8   |
|         | 2305   | 35.8                                          | 34.6  | 45.6   | 51.6   | 48.2   |
|         | 2310   | 39.4                                          | 41    | 51.2   | 53.2   | 56.1   |
| PRVtmv+ | 2320   | 37                                            | 37.8  | 51     | 56.8   | 58.8   |
|         | 2313   | 36                                            | 36.8  | 50.6   | 59.4   | 61.6   |
|         | 2304   | 40.8                                          | 42.6  | 53     | 63.8   | 65.6   |
|         | 2317   | 39                                            | 39.4  | 50.6   | 56.8   | 62.2   |
|         | 2302   | 41.8                                          | 43.4  | 60.4   | 64.4   | 64.4   |

**Supplementary table S4: PRVtmv+ vaccine virus replication in immunized pigs (nasal and tonsil swabs) - PRV-specific qPCR and virus isolation in swine kidney cells (in PRVtmv+ immunized pigs)**

dpv – days post vaccination; NI – Not isolated

| Animal | PRV qPCR – nasal swab |       |       |        | PRV isolation PFU/nasal swab |       |       |        |
|--------|-----------------------|-------|-------|--------|------------------------------|-------|-------|--------|
|        | 2 dpv                 | 4 dpv | 8 dpv | 14 dpv | 2 dpv                        | 4 dpv | 8 dpv | 14 dpv |
| 2320   | 12                    | 7854  | 170   | 0      | NI                           | NI    | NI    | NI     |
| 2313   | 1785.5                | 26826 | 0     | 0      | NI                           | 120   | NI    | NI     |
| 2304   | 22.5                  | 19615 | 0     | 0      | NI                           | 30    | NI    | NI     |
| 2317   | 0                     | 15774 | 794   | 0      | NI                           | NI    | NI    | NI     |
| 2302   | 706.5                 | 3994  | 0     | 0      | NI                           | NI    | NI    | NI     |

  

| Animal | PRV qPCR – tonsil swab |       |       |        | PRV isolation PFU/tonsil swab |       |       |        |
|--------|------------------------|-------|-------|--------|-------------------------------|-------|-------|--------|
|        | 2 dpv                  | 4 dpv | 8 dpv | 14 dpv | 2 dpv                         | 4 dpv | 8 dpv | 14 dpv |
| 2320   | 724                    | 1649  | 179   | 0      | 60                            | 15    | NI    | NI     |
| 2313   | 20222                  | 148   | 77    | 0      | 810                           | NI    | NI    | NI     |
| 2304   | 908                    | 354   | 322   | 0      | 45                            | NI    | NI    | NI     |
| 2317   | 3205                   | 568   | 0     | 0      | 60                            | NI    | NI    | NI     |
| 2302   | 217                    | 147   | 374   | 0      | NI                            | NI    | NI    | NI     |

**Supplementary table S5a: PRV-neutralizing antibody titer**

| Control group | PRV-neutralizing antibody titer – days-post vaccination (Days-post PCV2b challenge) |       |        |        |                   |                    |                    |
|---------------|-------------------------------------------------------------------------------------|-------|--------|--------|-------------------|--------------------|--------------------|
|               | Day 0                                                                               | Day 8 | Day 15 | Day 21 | Day 32<br>(0 dpc) | Day 45<br>(13 dpc) | Day 54<br>(21 dpc) |
| 2311          | <4                                                                                  | <4    | <4     | <4     | <4                | <4                 | <4                 |
| 2307          | <4                                                                                  | <4    | <4     | <4     | <4                | <4                 | <4                 |
| 2301          | <4                                                                                  | <4    | <4     | <4     | <4                | <4                 | <4                 |
| 2308          | <4                                                                                  | <4    | <4     | <4     | <4                | <4                 | <4                 |
| 2314          | <4                                                                                  | <4    | <4     | <4     | <4                | <4                 | <4                 |
| Average       | <4                                                                                  | <4    | <4     | <4     | <4                | <4                 | <4                 |

| PRVtmv+ group | PRV-neutralizing antibody titer – days-post vaccination (Days-post PCV2b challenge) |       |        |        |                   |                    |                    |
|---------------|-------------------------------------------------------------------------------------|-------|--------|--------|-------------------|--------------------|--------------------|
|               | Day 0                                                                               | Day 8 | Day 15 | Day 21 | Day 32<br>(0 dpc) | Day 45<br>(13 dpc) | Day 54<br>(21 dpc) |
| 2320          | <4                                                                                  | 6.68  | 76.34  | 12.62  | 26.5              | 25.84              | 13.26              |
| 2313          | <4                                                                                  | 23.35 | 47.07  | 14.33  | 57.21             | 79.87              | 29.59              |
| 2304          | <4                                                                                  | <4    | 40     | 7.03   | 23.17             | 13.08              | 6.3                |
| #2317         | <4                                                                                  | 5.74  | 24.84  | <4     | 15                | 6.3                | 5.4                |
| #2302         | <4                                                                                  | 5.65  | 10.02  | <4     | <4                | <4                 | <4                 |
| Average       | <4                                                                                  | 10.36 | 39.65  | 6.80   | 24.38             | 25.02              | 10.91              |

**Supplementary table S5b: PCV2b-neutralizing antibody titer**

| Group   | Animal | PCV2b-neutralizing antibody titer – days-post vaccination (Days post PCV-2 challenge) |        |        |                   |                   |                    |                    |
|---------|--------|---------------------------------------------------------------------------------------|--------|--------|-------------------|-------------------|--------------------|--------------------|
|         |        | Day 0                                                                                 | Day 15 | Day 21 | Day 32<br>(Day 0) | Day 39<br>(Day 7) | Day 45<br>(Day 13) | Day 53<br>(Day 21) |
| Control | 2311   | <4                                                                                    | <4     | <4     | <4                | <4                | 5.56               | 9.39               |
|         | 2307   | <4                                                                                    | <4     | <4     | <4                | <4                | <4                 | 9.49               |
|         | 2301   | <4                                                                                    | <4     | <4     | <4                | <4                | <4                 | 10.08              |
|         | 2308   | <4                                                                                    | <4     | <4     | <4                | <4                | <4                 | 9.8                |
|         | 2314   | <4                                                                                    | <4     | <4     | <4                | <4                | 5.55               | 25.36              |
| Average |        | <4                                                                                    | <4     | <4     | <4                | <4                | 2.22               | 12.82              |
| Fostera | 2319   | <4                                                                                    | 5.51   | 8.26   | 9.95              | 14.03             | 4.84               | 23.95              |
|         | 2316   | <4                                                                                    | 10.87  | 5.52   | 16.25             | 12.19             | 5.27               | 42.68              |
|         | 2318   | <4                                                                                    | 5.26   | 5.19   | 10.97             | 9.77              | 4.44               | 13.68              |
|         | 2305   | <4                                                                                    | 10.65  | 7.79   | 20.21             | 14.73             | 7.08               | 15.28              |
|         | 2310   | <4                                                                                    | 6.96   | 13.05  | 23.48             | 16.97             | 9.89               | 44.17              |
| Average |        | <4                                                                                    | 7.85   | 7.97   | 16.17             | 13.54             | 6.30               | 27.95              |
| PRVtmv+ | 2320   | <4                                                                                    | 17.16  | 9.9    | 23.64             | 16.29             | 6.85               | 20.42              |
|         | 2313   | <4                                                                                    | 18.81  | 10.28  | 25.95             | 16.80             | 5.97               | 39.24              |
|         | 2304   | <4                                                                                    | 16.89  | 11.25  | 24.24             | 21.56             | 9.47               | 37.53              |
|         | 2317   | <4                                                                                    | 6.96   | 5.49   | 14.82             | 4.94              | 4.97               | 41.79              |
|         | 2302   | <4                                                                                    | 14     | 13.50  | 23.75             | 16.94             | 18.74              | 81.57              |
| Average |        | <4                                                                                    | 14.76  | 10.01  | 22.48             | 15.31             | 9.2                | 44.11              |

**Supplementary table S5c: CSFV-neutralizing antibody titer**

| PRVtmv+<br>group | CSFV-specific neutralizing antibody titers<br>(days-post vaccination) |          |            |             |
|------------------|-----------------------------------------------------------------------|----------|------------|-------------|
|                  | 0 dpv                                                                 | 15 dpv   | 21 dpv     | 32 dpv      |
| <b>2320</b>      | 3                                                                     | 12       | 12         | 16          |
| <b>2313</b>      | <2                                                                    | 6        | 12         | 8           |
| <b>2304</b>      | <2                                                                    | 3        | 8          | 24          |
| <b>2317</b>      | <2                                                                    | 2        | 3          | 6           |
| <b>2302</b>      | <2                                                                    | 2        | 4          | 3           |
| <b>Average</b>   | <b>0</b>                                                              | <b>5</b> | <b>7.8</b> | <b>11.4</b> |

**Supplementary table S6: Percent changes in leukocytes and lymphocytes count.** dpv – days-post vaccination; dpc – days-post challenge

| Group   | Animal | Leukocytes count (x10 <sup>3</sup> /μl) |                    |                                | Lymphocytes count (x10 <sup>3</sup> /μl) |                    |                                |
|---------|--------|-----------------------------------------|--------------------|--------------------------------|------------------------------------------|--------------------|--------------------------------|
|         |        | 32 dpv<br>(0 dpc)                       | 53 dpv<br>(21 dpc) | % difference<br>(0 and 21 dpc) | 32 dpv<br>(0 dpc)                        | 53 dpv<br>(21 dpc) | % difference<br>(0 and 21 dpc) |
| Control | 2311   | 18.3                                    | 13.7               | -25.13                         | 10.79                                    | 7.53               | -30.21                         |
|         | 2307   | 20.8                                    | 11.5               | -44.711                        | 13.29                                    | 8.99               | -32.35                         |
|         | 2301   | 20                                      | 15                 | -25                            | 10.81                                    | 5.85               | -45.88                         |
|         | 2308   | 18.2                                    | 15.9               | -12.63                         | 10.57                                    | 5.57               | -47.30                         |
|         | 2314   | 22.8                                    | 13.7               | -39.91                         | 11.4                                     | 10.13              | -11.14                         |
| Fostera | 2319   | 20                                      | 15.2               | -24                            | 8.81                                     | 5.34               | -39.38                         |
|         | 2316   | 20.8                                    | 17.7               | -14.90                         | 11.24                                    | 9.22               | -17.97                         |
|         | 2318   | 12.6                                    | 16.7               | 32.53                          | 10.42                                    | 11.17              | 7.19                           |
|         | 2305   | 21.6                                    | 13.7               | -36.57                         | 14.65                                    | 11.13              | -24.02                         |
|         | 2310   | 17.9                                    | 17.2               | -3.91                          | 15.61                                    | 14.13              | -9.48                          |
| PRVtmv+ | 2320   | 16.9                                    | 19.6               | 15.97                          | 9.27                                     | 9.71               | 4.746                          |
|         | 2313   | 14.7                                    | 14.1               | -4.08                          | 11.21                                    | 13.49              | 20.33                          |
|         | 2304   | 11.1                                    | 16                 | 44.14                          | 8.86                                     | 8.17               | -7.78                          |
|         | 2317   | 14.5                                    | 22                 | 51.72                          | 7.12                                     | 7.04               | -1.12                          |
|         | 2302   | 17.7                                    | 22                 | 24.29                          | 9.21                                     | 11.73              | 27.36                          |

**Supplementary table S7: Fecal PCV2b shedding. PCV2b- capsid gene-specific qPCR assay**

| Group   | Animal | Days post PCV-2 challenge (genome copies)<br>(two replicates) |   |       |   |        |    |        |   |
|---------|--------|---------------------------------------------------------------|---|-------|---|--------|----|--------|---|
|         |        | Day 0                                                         |   | Day 7 |   | Day 13 |    | Day 21 |   |
| Control | 2311   | -                                                             | - | -     | - | 11     | 14 | 16     | 9 |
|         | 2307   | -                                                             | - | -     | - | -      | -  | -      | - |
|         | 2301   | -                                                             | - | -     | - | -      | -  | -      | - |
|         | 2308   | -                                                             | - | -     | - | 37     | 34 | -      | - |
|         | 2314   | -                                                             | - | -     | - | -      | -  | -      | - |
| Fostera | 2319   | -                                                             | - | -     | - | -      | -  | -      | - |
|         | 2316   | -                                                             | - | -     | - | -      | -  | -      | - |
|         | 2318   | -                                                             | - | -     | - | -      | -  | -      | - |
|         | 2305   | -                                                             | - | -     | - | -      | -  | -      | - |
|         | 2310   | -                                                             | - | -     | - | -      | -  | -      | - |
| PRVtmv+ | 2320   | -                                                             | - | -     | - | -      | -  | -      | - |
|         | 2313   | -                                                             | - | -     | - | -      | -  | -      | - |
|         | 2304   | -                                                             | - | -     | - | -      | -  | -      | - |
|         | 2317   | -                                                             | - | -     | - | -      | -  | -      | - |
|         | 2302   | -                                                             | - | -     | - |        |    |        |   |

**Supplementary table S8a: PCV2b-viremia in serum. PCV2b- capsid gene-specific qPCR assay**

| Group   | Animal | Days post PCV-2 challenge (genome copies) (two replicates) |   |       |     |        |     |        |    |
|---------|--------|------------------------------------------------------------|---|-------|-----|--------|-----|--------|----|
|         |        | Day 0                                                      |   | Day 7 |     | Day 13 |     | Day 21 |    |
| Control | 2311   | -                                                          | - | -     | -   | -      | -   | 23     | 24 |
|         | 2307   | -                                                          | - | 38    | 62  | -      | -   | -      | -  |
|         | 2301   | -                                                          | - | 42    | 48  | 151    | 101 | 15     | 7  |
|         | 2308   | -                                                          | - | -     | -   | 17     | 21  | -      | -  |
|         | 2314   | -                                                          | - | 144   | 131 | -      | -   | -      | -  |
| Fostera | 2319   | -                                                          | - | -     | -   | -      | -   | -      | -  |
|         | 2316   | -                                                          | - | -     | -   | 44     | 38  | -      | -  |
|         | 2318   | -                                                          | - | -     | -   | -      | -   | -      | -  |
|         | 2305   | -                                                          | - | -     | -   | 19     | 12  | -      | -  |
|         | 2310   | -                                                          | - | -     | -   | -      | -   | -      | -  |
| PRVtmv+ | 2320   | -                                                          | - | -     | -   | -      | -   | -      | -  |
|         | 2313   | -                                                          | - | -     | -   | -      | -   | -      | -  |
|         | 2304   | -                                                          | - | -     | -   | -      | -   | -      | -  |
|         | 2317   | -                                                          | - | -     | -   | -      | -   | -      | -  |
|         | 2302   | -                                                          | - | -     | -   | -      | -   | -      | -  |



**Supplementary table S8b: PBMC-associated PCV2b viremia. PCV2b- capsid gene-specific qPCR assay**

| Group   | Animal | Days post PCV-2 challenge (genome copies) PBMC-associated viremia<br>(two replicates) |   |       |     |        |      |        |       |
|---------|--------|---------------------------------------------------------------------------------------|---|-------|-----|--------|------|--------|-------|
|         |        | Day 0                                                                                 |   | Day 7 |     | Day 13 |      | Day 21 |       |
| Control | 2311   | -                                                                                     | - | -     | -   | -      | -    | 5485   | 5863  |
|         | 2307   | -                                                                                     | - | 223   | 312 | -      | -    | 596    | 407   |
|         | 2301   | -                                                                                     | - | 872   | 787 | 2776   | 2855 | 14554  | 14013 |
|         | 2308   | -                                                                                     | - | -     | -   | 1438   | 1605 | 912    | 674   |
|         | 2314   | -                                                                                     | - | 783   | 801 | 602    | 455  | 843    | 1007  |
| Fostera | 2319   | -                                                                                     | - | -     | -   | -      | -    | -      | -     |
|         | 2316   | -                                                                                     | - | -     | -   | 179    | 212  | -      | -     |
|         | 2318   | -                                                                                     | - | -     | -   | 88     | 69   | -      | -     |
|         | 2305   | -                                                                                     | - | -     | -   | 437    | 327  | -      | -     |
|         | 2310   | -                                                                                     | - | -     | -   | -      | -    | -      | -     |
| PRVtmv+ | 2320   | -                                                                                     | - | -     | -   | -      | -    | -      | -     |
|         | 2313   | -                                                                                     | - | -     | -   | -      | -    | -      | -     |
|         | 2304   | -                                                                                     | - | -     | -   | -      | -    | -      | -     |
|         | 2317   | -                                                                                     | - | -     | -   | -      | -    | -      | -     |
|         | 2302   | -                                                                                     | - | -     | -   | -      | -    | -      | -     |

## Supplementary table S9: Quantification of PCV2b viral genome copies in pig's lymphoid tissues.

Normalized viral genome copies (per 10<sup>6</sup> cells); LN – lymph node

| Group   | Animal | PCV-2 – normalized mean viral genome copies (per 10 <sup>6</sup> cells) |               |                |             |                 |        |
|---------|--------|-------------------------------------------------------------------------|---------------|----------------|-------------|-----------------|--------|
|         |        | Tonsil                                                                  | Mesenteric LN | Mediastinal LN | Cervical LN | Peyer's patches | Spleen |
| Control | 2311   | 32                                                                      | -             | -              | 828         | -               | -      |
|         | 2307   | 77                                                                      | 61            | 38             | 838         | 79              | 50     |
|         | 2301   | 826                                                                     | 15            | -              | 575         | 2503            | -      |
|         | 2308   | 106                                                                     | -             | -              | 140         | -               | -      |
|         | 2314   | 589                                                                     | 742           | 71             | 1628        | 13189           | 5955   |
| Group   | Animal | PCV-2 normalized mean viral genome copies (per 10 <sup>6</sup> cells)   |               |                |             |                 |        |
|         |        | Tonsil                                                                  | Mesenteric LN | Mediastinal LN | Cervical LN | Peyer's patches | Spleen |
| Fostera | 2319   | -                                                                       | -             | -              | -           | -               | -      |
|         | 2316   | -                                                                       | -             | -              | -           | -               | -      |
|         | 2318   | -                                                                       | -             | -              | -           | -               | -      |
|         | 2305   | 23                                                                      | -             | 37             | 21          | -               | -      |
|         | 2310   | -                                                                       | -             | 58             | 7           | 861             | -      |
| Group   | Animal | PCV-2 normalized mean viral genome copies (per 10 <sup>6</sup> cells)   |               |                |             |                 |        |
|         |        | Tonsil                                                                  | Mesenteric LN | Mediastinal LN | Cervical LN | Peyer's patches | Spleen |
| PRVtmv+ | 2320   | -                                                                       | -             | -              | -           | -               | -      |
|         | 2313   | -                                                                       | -             | -              | -           | -               | -      |
|         | 2304   | -                                                                       | -             | -              | -           | -               | -      |
|         | 2317   | -                                                                       | -             | -              | -           | -               | -      |
|         | 2302   | -                                                                       | -             | 22             | -           | -               | -      |
